# Supplementary material for: Dual-benefit strategy for developing an efficient photodetector with prompt response to UV-near IR radiations: in situ synthesis and crystallization through a simple one-step annealing
Source: Royal Society of Chemistry journal article supplement (doi:10.1039/d4ta03202k), 2024-01-01
Supplement: d4ta03202k1.pdf [file d4ta03202k1.pdf]

Dual-benefit strategy for developing an efficient photodetector with prompt response to UV-near IR radiations: *in situ* synthesis and crystallization through a simple one-step annealing

Miao Yu<sup>a</sup>, Zhi-Chen Wan<sup>a</sup>, Si-Wei Song<sup>a</sup>, Zhi-Yong Yang<sup>a,b\*</sup>, Mitsuharu Suzuki<sup>c\*,#</sup>, Hiroko Yamada<sup>c\*,+</sup>

a: School of Chemical Science, University of Chinese Academy of Sciences (UCAS), 19A Yuquanlu, Beijing, 100049, P. R. China.

b: Binzhou Institute of Technology, Weiqiao-UCAS Science and Technology Park, Binzhou, Shandong Province, China, 256606

c: Graduate School of Materials Science, Nara Institute of Science and Technology (NAIST), 8916-5 Takayama-cho, Ikoma, Nara 630-0192, Japan.

#: Current address: Division of Applied Chemistry, Graduate School of Engineering, Osaka University, 2-1 Yamadaoka, Suita, Osaka 565-0871, Japan.

+: Current address: Institute for Chemical Research, Kyoto University, Gokasho, Uji, Kyoto 611-0011, Japan.

\*Corresponding authors: yangzhiyong@ucas.ac.cn (Z.-Y. Yang); msuzuki@chem.eng.osaka-u.ac.jp (M. Suzuki); hyamada@scl.kyoto-u.ac.jp (H. Yamada).

Figure S1

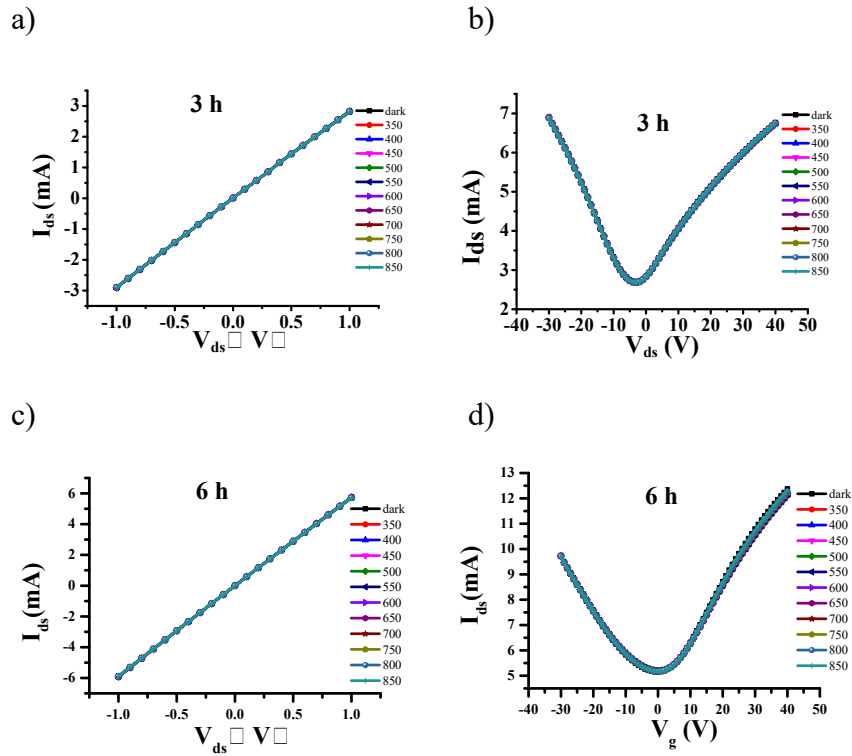

Figure S1 Typical  $I_{ds}$ - $V_{ds}$  ( $V_g=0$  V) and  $I_{ds}$ - $V_g$  curves ( $V_{ds}=1$  V) of 3 h (a and b) and 6 h (c and d) C8-DPP-BP/G phototransistors in dark and upon radiations. Incident power density ( $P_{in}$ ) of radiations in (a-d) :  $P_{in}$  (350 nm)= 0.48 mW cm<sup>-2</sup>,  $P_{in}$  (400 nm)= 0.63 mW cm<sup>-2</sup>,  $P_{in}$  (450 nm)= 0.7 mW cm<sup>-2</sup>,  $P_{in}$  (500 nm)= 0.68 mW cm<sup>-2</sup>,  $P_{in}$  (550 nm)= 0.51 mW cm<sup>-2</sup>,  $P_{in}$  (600 nm)= 0.37 mW cm<sup>-2</sup>,  $P_{in}$  (650 nm)= 0.26 mW cm<sup>-2</sup>,  $P_{in}$  (700 nm)= 0.19 mW cm<sup>-2</sup>,  $P_{in}$  (750 nm)= 0.14 mW cm<sup>-2</sup>,  $P_{in}$  (800 nm)= 0.1 mW cm<sup>-2</sup>,  $P_{in}$  (850 nm)= 0.08 mW cm<sup>-2</sup>.

Table S1 R and D\* values in part of current researches and this work

| Materials                                                      | R (A W <sup>-1</sup> ) | D* (Jones)           | Wavelength,<br>Power or power density                     |
|----------------------------------------------------------------|------------------------|----------------------|-----------------------------------------------------------|
| 6 h C8-DPP-BP/G<br>(this work)                                 | 100-350                | 1-3*10 <sup>11</sup> | 350-850 nm,<br>0.08-0.7 mW cm <sup>-2</sup>               |
| G/h-BN/PTCDI<br>C13/G <sup>1</sup>                             | - 180                  | 10 <sup>10</sup>     | 550 nm,<br>13.7 mW cm <sup>-2</sup>                       |
| PTCDI-C8/G <sup>2</sup>                                        | ~0.1 <sup>a</sup>      | ~10 <sup>10, a</sup> | 480 nm, 0.001 mW                                          |
| G/C <sub>60</sub> /pentacene <sup>3</sup>                      | ~100-1000              | -                    | 405-1550 nm,<br>1-0.1 mW cm <sup>-2</sup>                 |
| Perovskite/G <sup>4</sup>                                      | ~100 <sup>a</sup>      | ~10 <sup>9, a</sup>  | 520 nm, 0.001 mW                                          |
| G/rhodamine<br>film/G <sup>5</sup>                             | 6G 500                 | -                    | 520 nm, 0.1 mW                                            |
| C <sub>60</sub> /G <sup>6</sup>                                | ~100-1000 <sup>a</sup> | -                    | 360-808 nm, 100 nW                                        |
| Thieno[3,4-<br>b]thiophene/benzodithi<br>ophene/G <sup>7</sup> | ~100-1000 <sup>a</sup> | -                    | White-light emitting<br>diodes, 1-0.1 mW cm <sup>-2</sup> |
| C <sub>60</sub> /Zn<br>phthalocyanine/G <sup>8</sup>           | ~10-1000 <sup>a</sup>  | -                    | 650 nm,<br>1-0.1 mW cm <sup>-2</sup>                      |
| 2,6-diphenyl<br>anthracene/G <sup>9</sup>                      | ~10-100 <sup>b</sup>   | 10 <sup>13</sup>     | Xenon lamp,<br>0.62 mW cm <sup>-2</sup>                   |

a: Estimated from the R (D\*)-power or power density curves

b: Estimated from the R-V<sub>g</sub> curve

Figure S2

a)

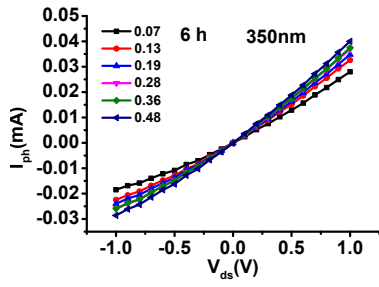

b)

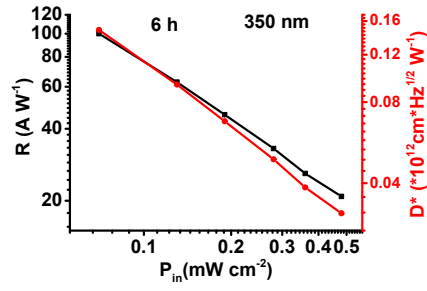

c)

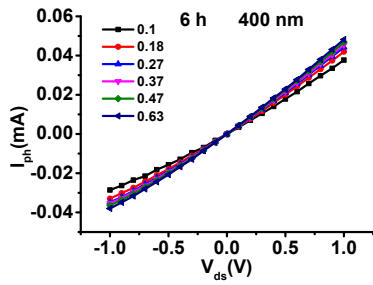

d)

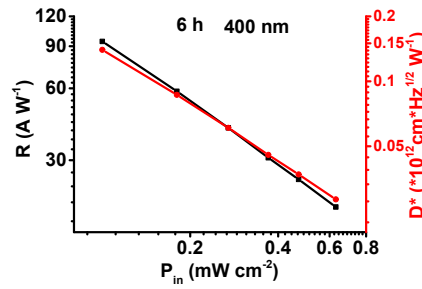

e)

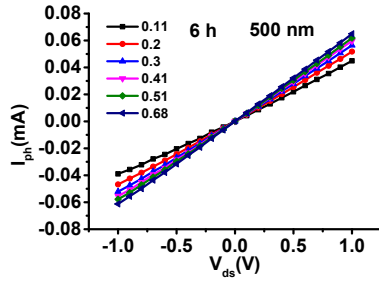

f)

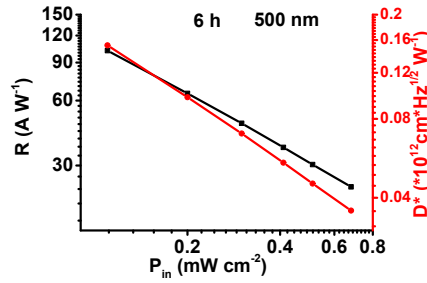

g)

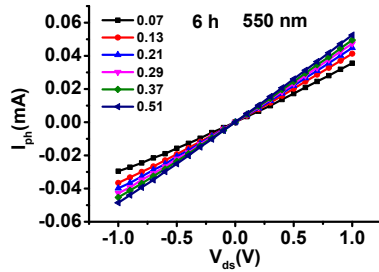

h)

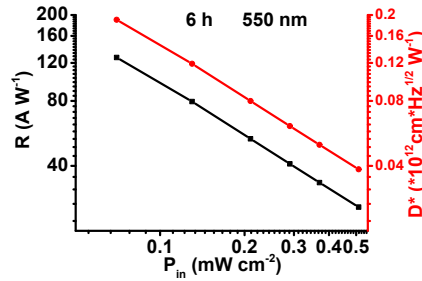

i)

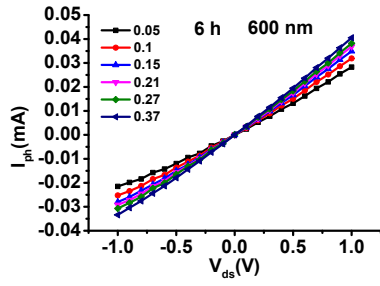

j)

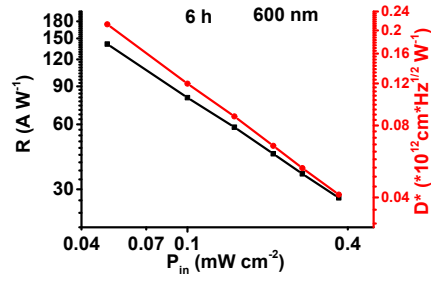

k)

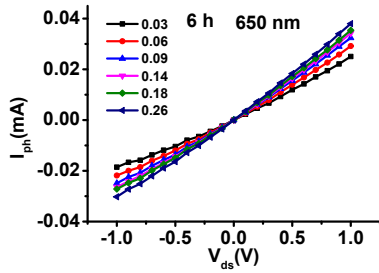

l)

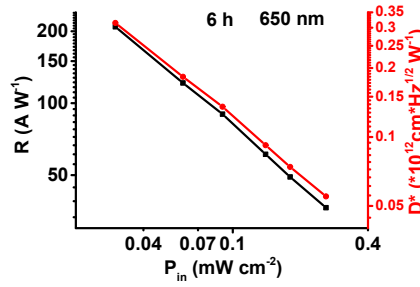

m)

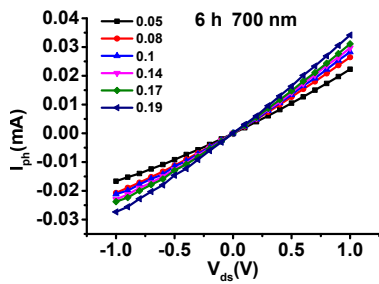

n)

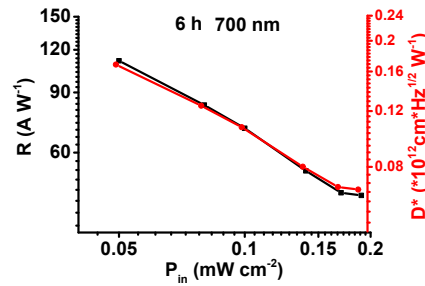

o)

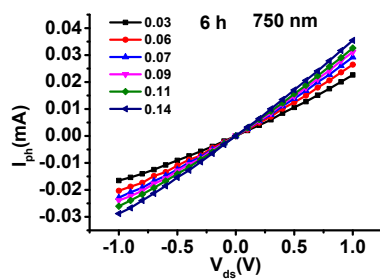

p)

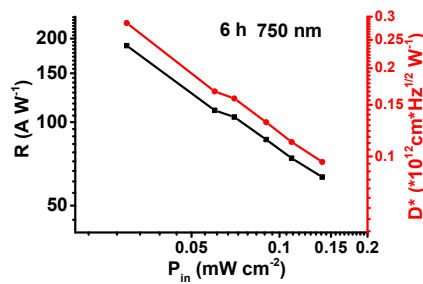

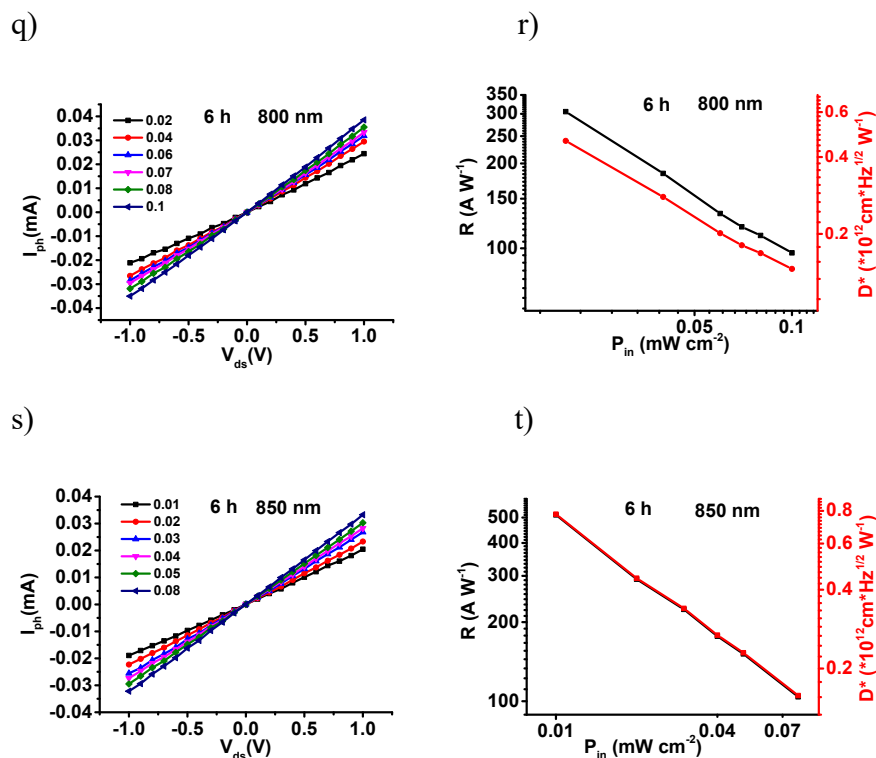

Figure S2 Typical  $I_{ph}$ - $V_{ds}$  curves at different  $P_{in}$  ( $mW\ cm^{-2}$ ,  $V_g=0\ V$ ) and  $R/D^*$ -  $P_{in}$  lines (bilogarithmical scales,  $V_{ds}=1\ V$ ,  $V_g=0\ V$ ) of 6 h C8-DPP-BP/G phototransistors.

## References

1. B. Sun, G. Zhou, Y. Wang, X. Xu, L. Tao, N. Zhao, H. K. Tsang, X. Wang, Z. Chen and J.-B. Xu, *Adv. Optical Mater.*, 2021, **9**, 2100158.
2. Y. J. Choi, H. J. Woo, S. Kim, J. Sun, M. S. Kang, Y. J. Song and J. H. Cho, *J. Ind. Eng. Chem.*, 2020, **89**, 233-238.
3. J. Han, J. Wang, M. Yang, X. Kong, X. Chen, Z. Huang, H. Guo, J. Gou, S. Tao, Z. Liu, Z. Wu, Y. Jiang and X. Wang, *Adv. Mater.*, 2018, **30**, 1804020.
4. Y. Lee, J. Kwon, E. Hwang, C.-H. Ra, W. J. Yoo, J.-H. Ahn, J. H. Park and J. H. Cho, *Adv. Mater.*, 2015, **27**, 41-46.
5. Y. Lee, H. Kim, S. Kim, D. Whang and J. H. Cho, *ACS Appl. Mater. Interfaces*, 2019, **11**, 23474-23481.
6. S. Qin, Q. Du, R. Dong, X. Yan, Y. Liu, W. Wang and F. Wang, *Carbon*, 2020,

**167**, 668-674.

7. P.-H. Chang, Y.-C. Tsai, S.-W. Shen, S.-Y. Liu, K.-Y. Huang, C.-S. Li, H.-P. Chang and C.-I. Wu, *ACS Photonics*, 2017, **4**, 2335-2344.

8. M. He, J. Han, X. Han, J. Gou, M. Yang, Z. Wu, Y. Jiang and J. Wang, *Carbon*, 2021, **178**, 506-514.

9. J. Liu, K. Zhou, J. Liu, J. Zhu, Y. Zhen, H. Dong and W. Hu, *Adv. Mater.*, 2018, **30**, 1803655.
